# Supplementary material
Source: PubMed Central journal article supplement (PMC4025950)

**Fig. S1**

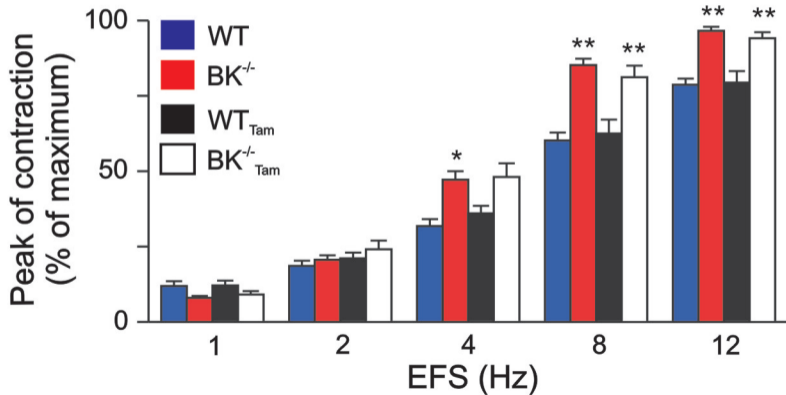

Supplement: NIHMS58145-supplement-FigS1.pdf [file NIHMS58145-supplement-FigS1.pdf]

**Fig. S2**

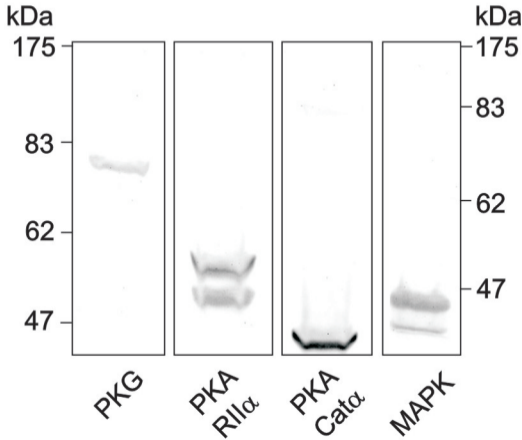

Supplement: NIHMS58145-supplement-FigS2.pdf [file NIHMS58145-supplement-FigS2.pdf]

Fig. S3

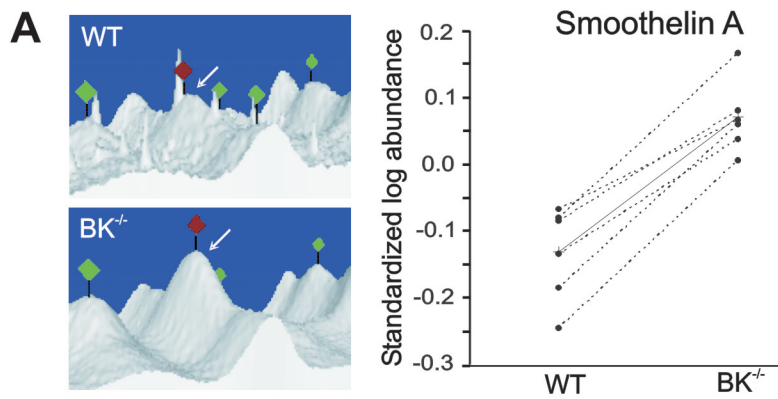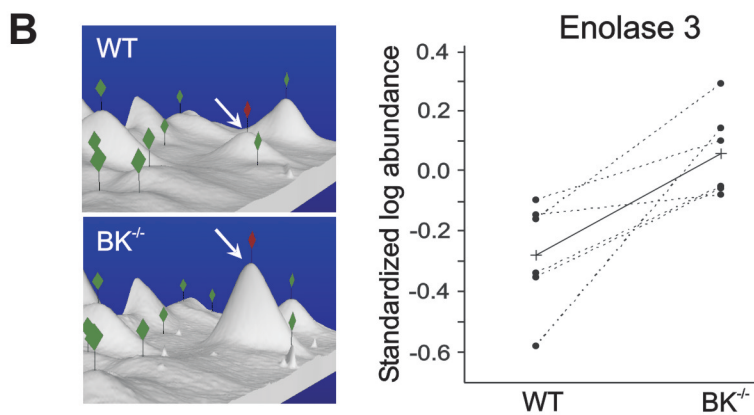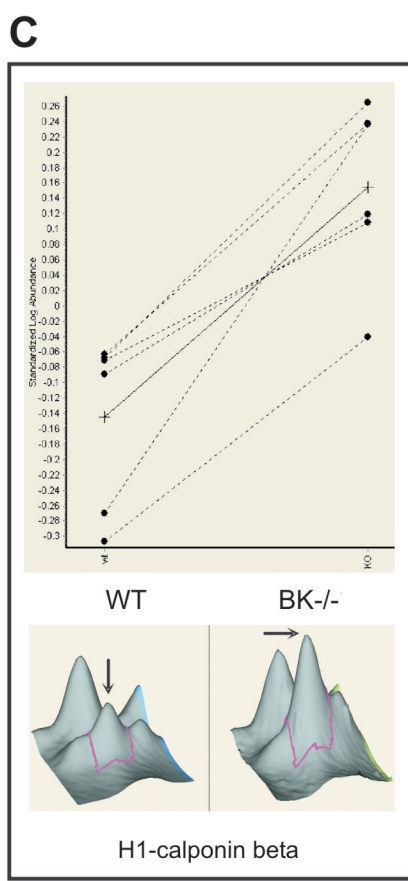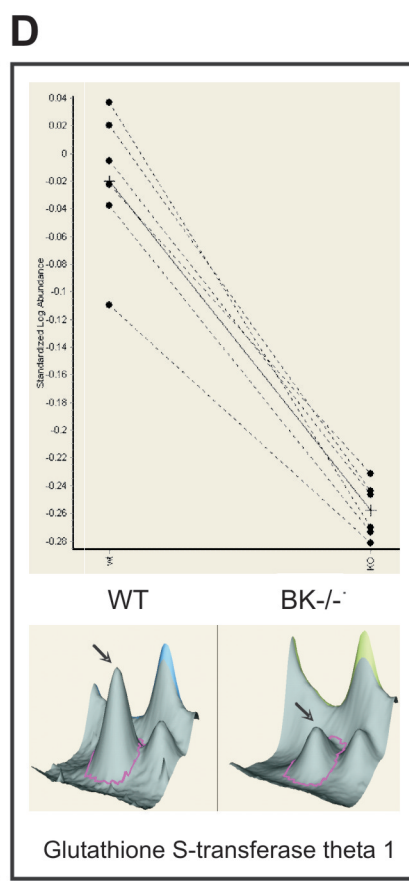

Supplement: NIHMS58145-supplement-FigS3.pdf [file NIHMS58145-supplement-FigS3.pdf]
